# Supplementary material for: Advancing Urban Wastewater Management: Optimizing Sewer Performance through Innovative Material Selection for the Armlet with a Wet Circuit Measurement System
Source: MDPI journal article supplement (doi:10.3390/app131910892), 2023-09-30
Supplement: s1 [file s1]

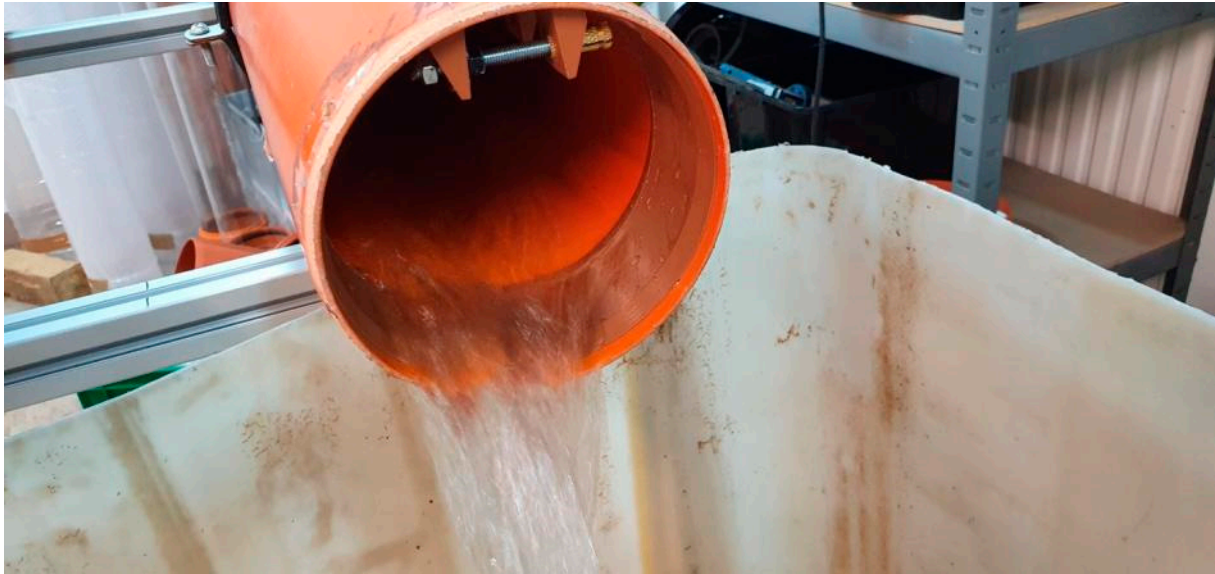

**Figure S1.** ABS ULTRAT measurement strap securely attached in a streamlined shape, printed using 3D technology.

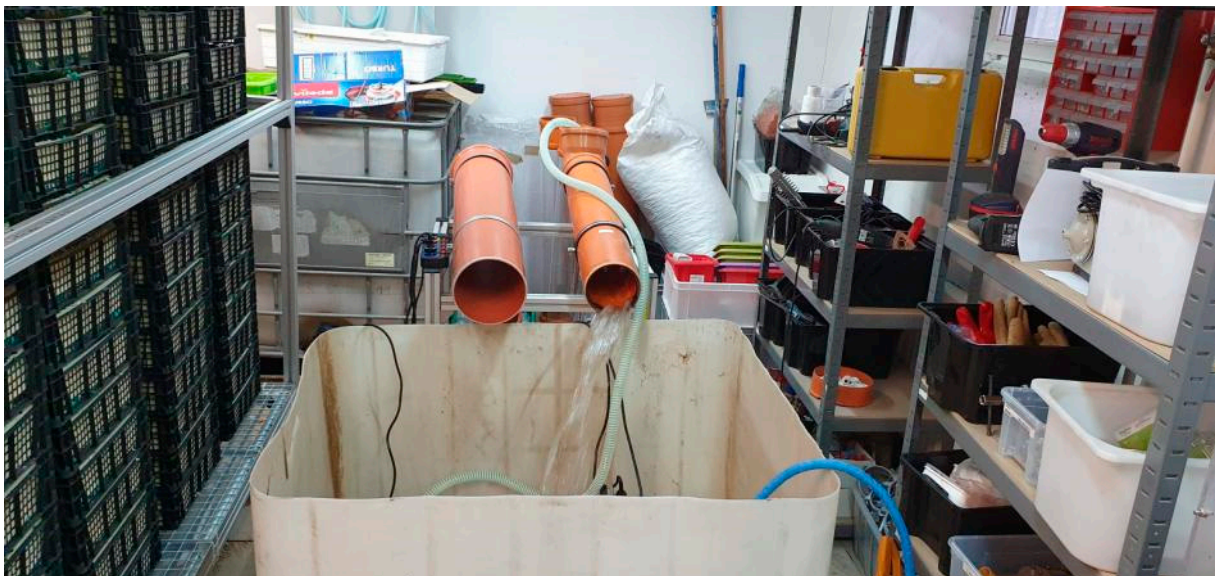

**Figure S2.** View of the research setup during hydraulic load testing with water flow.

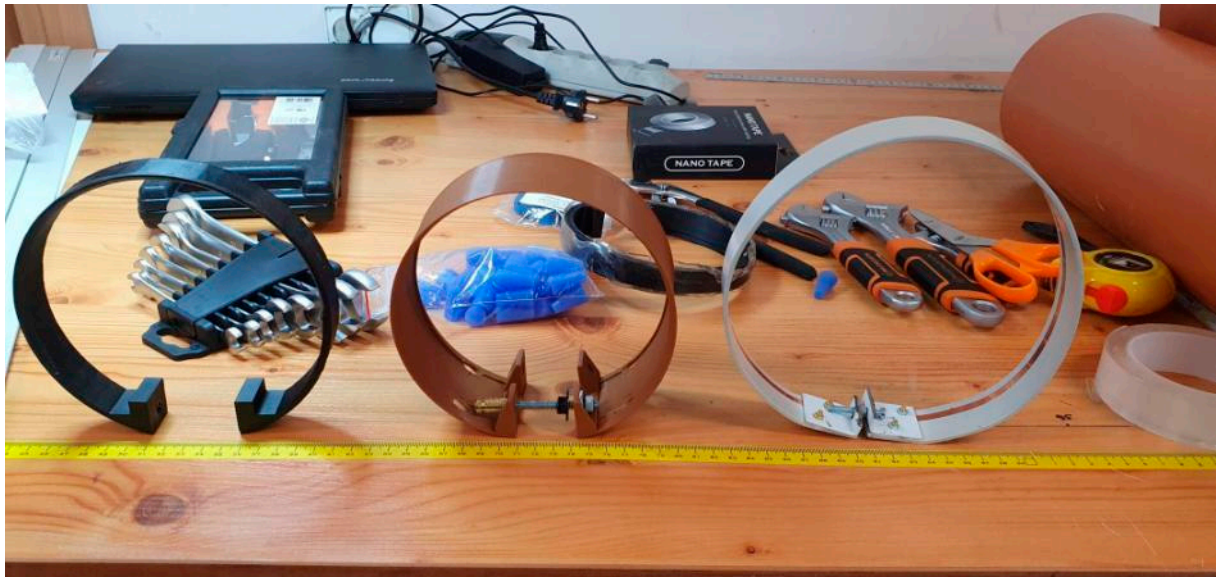

**Figure S3.** View of three example straps: on the left, a strap made of ABS ULTRAT; in the middle, a wider strap made of brown ABS; on the right, a strap made of PVC flat bar.

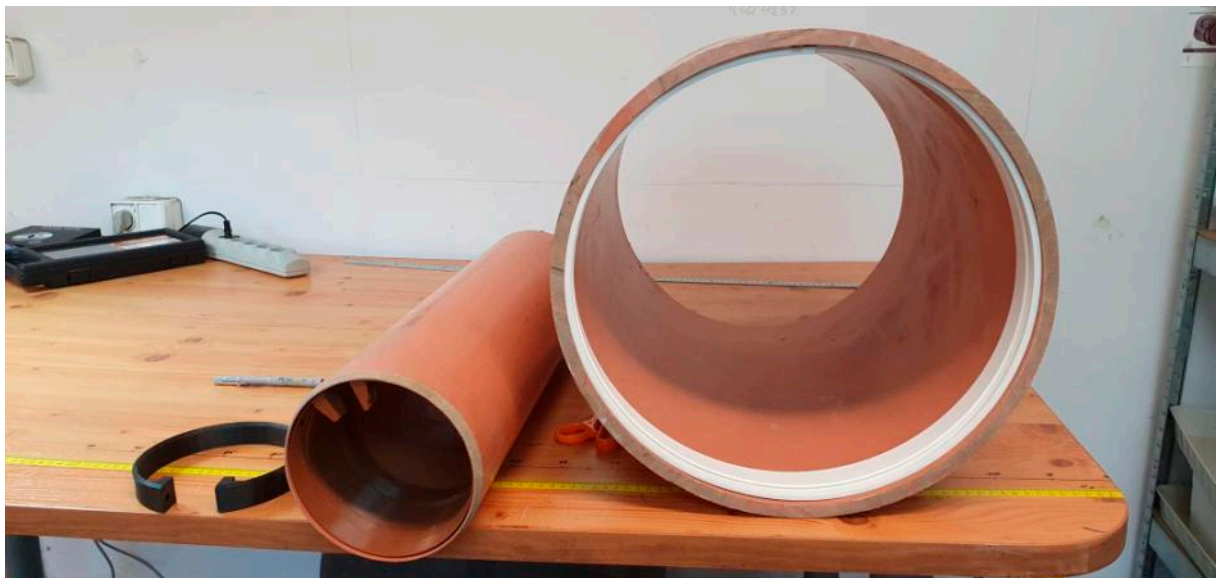

**Figure S4.** Examples of mounted straps on a 400 mm diameter sewage pipe: in the middle, a wide strap made of brown ABS; on the left, a narrow strap made of black ABS.
